# Supplementary material for: Desiccation Tolerance in Ramonda serbica Panc.: An Integrative Transcriptomic, Proteomic, Metabolite and Photosynthetic Study
Source: MDPI journal article supplement (doi:10.3390/plants11091199), 2022-04-28
Supplement: s1 [file s1]

## DEGs

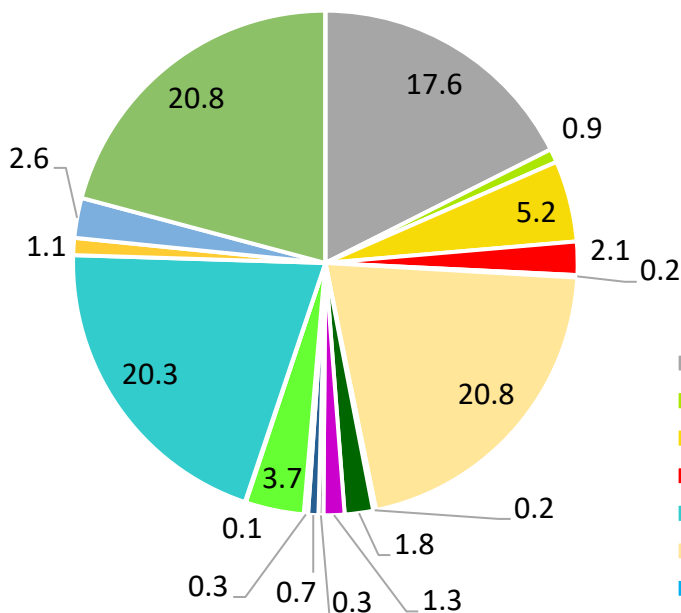

## DAPs

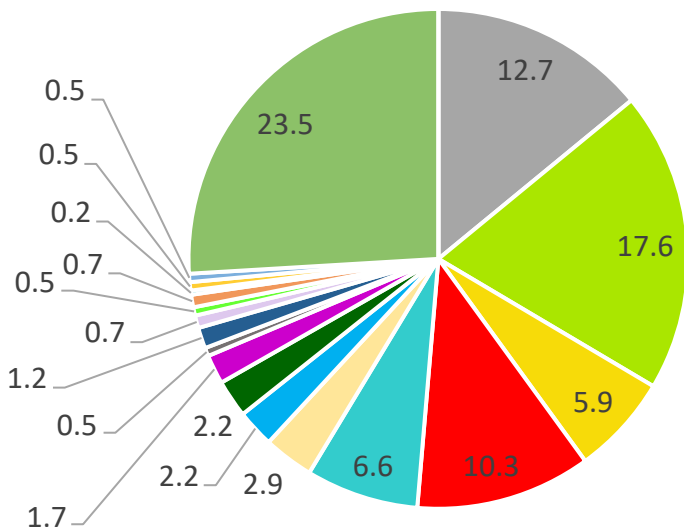

- Translation, protein modif. & maturation
- Photosynthesis
- Carbohydrate metabolism
- Response to stress
- Embryo development
- Transport
- Protein targeting
- Amino acid metabolism
- Signal transduction
- Cell wall organization
- Protein folding
- Cell cycle
- Lipid metabolism
- Secondary metabolism
- N-cycle metabolism
- Cofactor metabolism
- DNA metabolism
- Other
