# Supplementary material for: Desiccation Tolerance in Ramonda serbica Panc.: An Integrative Transcriptomic, Proteomic, Metabolite and Photosynthetic Study
Source: MDPI journal article supplement (doi:10.3390/plants11091199), 2022-04-28

**Motifs**

M1 ■ FVQQJPGLNTLGVSLVRIDLAPGGLNPPHTHPRASEILFVLKGTLDVGFI **BOX B**

M2 ■ ANKLYAKIJKPGDIYVFPRGLIHFQYNGKTPAAAYAAFNSQLPGTQTIA **BOX C**

M3 ■ SYAADPDPLQDICVADLDS **BOX A**

M4 ■ PPVPPELLAKAFQIDVKEVEKJKSLFAPK

M5 ■ VFVNGKFCKNPELVTPEDFFYSGLDKVVNTSNQLGSKLTPV

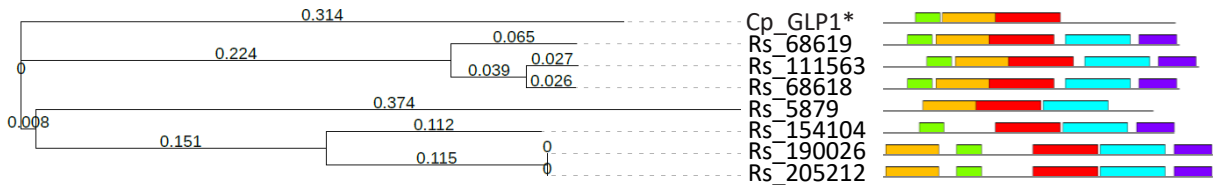

Supplement: s1 [file s1]
