# Supplementary material for: Desiccation Tolerance in Ramonda serbica Panc.: An Integrative Transcriptomic, Proteomic, Metabolite and Photosynthetic Study
Source: MDPI journal article supplement (doi:10.3390/plants11091199), 2022-04-28
Supplement: s1 [file s1]

**Supplementary Table S7.** Content of phenolics in methanol extracts of *R. serbica* HL and DL. Values are given in  $\mu\text{mol gDW}^{-1}$  and presented as means  $\pm$  SE (n = 3-5). Asterisks denote significant differences between treatments and respective controls according to *t*-test (\* $P < 0.05$ ).

| Phenolic compound       | HL               | DL               |
|-------------------------|------------------|------------------|
| Syringic acid           | 22.4 $\pm$ 3.5   | 38.6 $\pm$ 8.1   |
| Caffeic acid (CA)       | 4.82 $\pm$ 0.31  | 5.59 $\pm$ 0.70  |
| Chlorogenic acid        | 5.40 $\pm$ 0.31  | 5.98 $\pm$ 0.89  |
| <i>p</i> -coumaric acid | 0.94 $\pm$ 0.16  | 0.94 $\pm$ 0.17  |
| X337 (calc. as CA)      | 36.3 $\pm$ 3.0   | 45.6 $\pm$ 5.2 * |
| Catechin                | 126.6 $\pm$ 19.6 | 196.7 $\pm$ 37.4 |
| Epicatechin             | 40.6 $\pm$ 4.2   | 39.1 $\pm$ 1.3   |
| Quercetin               | 15.9 $\pm$ 1.6   | 15.4 $\pm$ 1.5   |
| Kaempferol              | 14.5 $\pm$ 3.5   | 29.0 $\pm$ 5.0   |
| Kaempferol derivatives  | 1.57 $\pm$ 0.30  | 1.64 $\pm$ 0.24  |
