# Supplementary material for: Desiccation Tolerance in Ramonda serbica Panc.: An Integrative Transcriptomic, Proteomic, Metabolite and Photosynthetic Study
Source: MDPI journal article supplement (doi:10.3390/plants11091199), 2022-04-28
Supplement: s1 [file s1]

**Supplementary Table S6.** Mol % of soluble sugars in HL and DL of *R. serbica*. Values are presented as means  $\pm$  SE (n = 5-6). Asterisks denote significant differences between treatments and respective controls according to the *t*-test (\* $P$  < 0.05, \*\* $P$  < 0.01, \*\*\* $P$  < 0.001).

|                             | HL              | DL                |                                | HL              | DL                  |
|-----------------------------|-----------------|-------------------|--------------------------------|-----------------|---------------------|
| <b><i>Hexose</i></b>        |                 |                   | <b><i>Oligosaccharides</i></b> |                 |                     |
| Glucose                     | 33.7 $\pm$ 2.8  | 27.8 $\pm$ 3.0    | Isomaltotriose                 | 0.14 $\pm$ 0.05 | 4.19 $\pm$ 0.04     |
| Fructose                    | 25.6 $\pm$ 2.1  | 24.5 $\pm$ 2.9    | Maltotriose                    | 0.25 $\pm$ 0.05 | 2.55 $\pm$ 0.02     |
| Galactose                   | 7.2 $\pm$ 0.8   | 9.9 $\pm$ 1.1     | Raffinose                      | 0.23 $\pm$ 0.09 | 5.10 $\pm$ 0.02     |
| <b><i>Pentose</i></b>       |                 |                   | Melezitose                     | 0.10 $\pm$ 0.03 | 4.58 $\pm$ 0.01     |
| Arabinose                   | 2.5 $\pm$ 0.8   | 5.9 $\pm$ 0.7     | Panose                         | 0.01 $\pm$ 0.01 | 5.64 $\pm$ 0.01     |
| Ribose                      | 0.9 $\pm$ 0.2   | 3.1 $\pm$ 0.3     | Stachyose                      | 0.02 $\pm$ 0.01 | 3.47 $\pm$ 0.01 *** |
| Rhamnose                    | 0.09 $\pm$ 0.02 | 3.63 $\pm$ 0.4 ** | <b><i>Sugar alcohols</i></b>   |                 |                     |
| Xylose                      | 0.5 $\pm$ 0.2   | 4.0 $\pm$ 0.1     | Erythritol                     | 3.3 $\pm$ 1.1   | 6.3 $\pm$ 0.5       |
| <b><i>Disaccharides</i></b> |                 |                   | Sorbitol                       | 1.5 $\pm$ 0.5   | 5.4 $\pm$ 1.0       |
| Sucrose                     | 14.0 $\pm$ 4.8  | 16.5 $\pm$ 3.4    | Galactitol                     | 3.7 $\pm$ 1.2   | 7.5 $\pm$ 2.7       |
| Trehalose                   | 1.1 $\pm$ 0.1   | 2.2 $\pm$ 0.4     | Arabinitol                     | 0.57 $\pm$ 0.19 | 4.92 $\pm$ 0.27     |
| Melibiose                   | 0.11 $\pm$ 0.03 | 4.12 $\pm$ 0.03   | mannitol                       | 0.33 $\pm$ 0.10 | 3.9 $\pm$ 0.1       |
| Maltose                     | 0.53 $\pm$ 0.15 | 4.12 $\pm$ 0.26 * |                                |                 |                     |
| Isomaltose                  | 1.4 $\pm$ 0.3   | 4.1 $\pm$ 0.3     |                                |                 |                     |
| Turanose                    | 3.3 $\pm$ 0.1   | 6.9 $\pm$ 1.2     |                                |                 |                     |
