# Supplementary figures and images for: Desiccation Tolerance in Ramonda serbica Panc.: An Integrative Transcriptomic, Proteomic, Metabolite and Photosynthetic Study
Source: MDPI journal article supplement (doi:10.3390/plants11091199), 2022-04-28

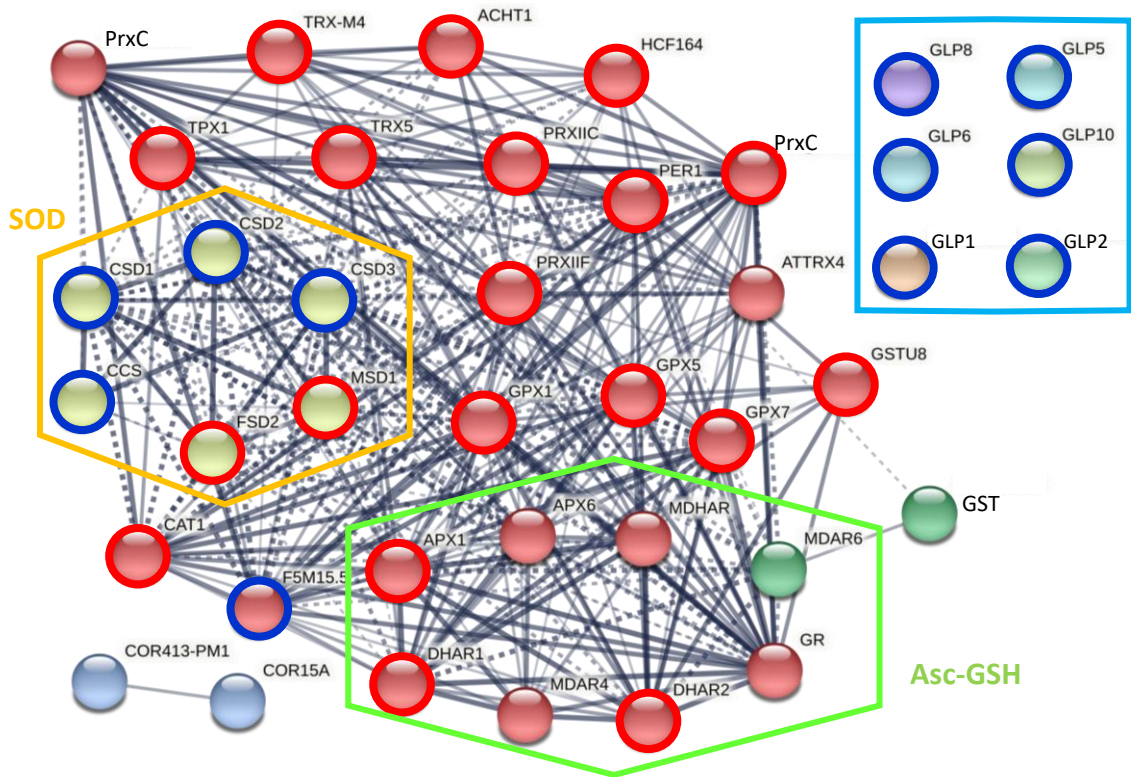

Supplement: s1 [file s1]
